# Supplementary material for: Qualitative study of healthcare providers’ current practice patterns and barriers to successful rehydration for pediatric diarrheal illnesses in Kenya
Source: PeerJ. 2017 Oct 6;5:e3829. doi: 10.7717/peerj.3829 (PMC5633020; doi:10.7717/peerj.3829)
Supplement: Supplemental Information 1 [file peerj-05-3829-s001.xlsx]

## Sheet: Sheet1
Country	Facility	Type of facility	Position	Specialty if Consultant/Registrar	Degree of Dehydration	Next Step	2nd Next Step	3rd Next step (if needed)	Notes
Kenya	Hospital	Referral Hospital	Medical Officer		Severe	Try another IV	NG tube		two tries, last step ng tube
Kenya	Hospital	Referral Hospital	Clinical Officer		Severe	Try another IV	Try another IV	Intraosseus	multiple tries IV, last step IO
Kenya	Hospital	Referral Hospital	Clinical Officer		Severe	Intraosseus			two tries , last step io
Kenya	Hospital	Referral Hospital	Nurse		Severe	Intraosseus			two tries last step io
Kenya	Hospital	Referral Hospital	Clinical Officer		Severe	Try another IV	Try another IV	Intraosseus	multiple tries, last step io
Kenya	Hospital	Referral Hospital	Nurse		Severe	Try another IV	Try another IV	Intraosseus	multiple tries IV, last step IO
Kenya	Hospital	Referral Hospital	Clinical Officer		Severe	Try another IV	Try another IV	NG tube	multiple tries then ng tube
Kenya	Hospital	Referral Hospital	Clinical Officer		Severe	Try another IV	Have someone else try IV	Admit	multiple tries then admit
Kenya	Hospital	Referral Hospital	Clinical Officer		Severe	Try another IV	NG tube		multiple tries then ng tube
Kenya	Hospital	Referral Hospital	Medical Officer		Severe	Try another IV	Try another IV	NG tube	multiple tries, last step ng tube
Kenya	Clinic	Health Center	Clinical Officer		Severe	ORS	Try another IV	Intraosseus
Kenya	Clinic	Health Center	Nurse		Severe	Transfer			went for reffaral straight
Kenya	Clinic	Health Center	Nurse		Severe	Transfer			went straight to reffaral
Kenya	Hospital	District Hospital	Clinical Officer		Severe	Try another IV	Intraosseus
Kenya	Hospital	District Hospital	Community Health Worker		Mild	ORS	NG tube
Kenya	Clinic	Health Center	Clinical Officer		Severe	ORS	NG tube		giving ORS via the NG tube
Kenya	Hospital	Referral Hospital	Nurse		Severe	Intraosseus			went straight away to intraosseous
Kenya	Hospital	Referral Hospital	Medical Officer		Severe	Intraosseus			went straight away to intraosseous
Kenya	Hospital	Referral Hospital	Clinical Officer		Shock	Intraosseus			went straight away to intraosseous
Kenya	Clinic	Health Center	Nurse		Severe	Transfer			went for reffaral straight being in a health centre
Kenya	Hospital	Sub-District Hospital	Nurse		Severe	Try another IV	Cut-down for IV		several attempts then cut down
Kenya	Hospital	Sub-District Hospital	Community Health Worker		Severe	Try another IV	ORS	Transfer
Kenya	Hospital	Sub-District Hospital	Nurse		Severe	Try another IV	Cut-down for IV
Kenya	Hospital	Sub-District Hospital	Nurse		Severe	ORS	Transfer
Kenya	Hospital	Sub-District Hospital	Clinical Officer		Severe	NG tube
Kenya	Hospital	Sub-District Hospital	Nurse		Severe	NG tube
Kenya	Hospital	Sub-District Hospital	Clinical Officer		Severe	ORS	Cut-down for IV
Kenya	Hospital	Sub-District Hospital	Clinical Officer		Severe	Try another IV	Cut-down for IV
Kenya	Clinic	Dispensery	Nurse		Severe	ORS	Transfer
Kenya	Clinic	Dispensery	Nurse		Severe	ORS	Transfer
Kenya	Clinic	Dispensery	Nurse		Severe	ORS	Transfer
Kenya	Clinic	Dispensery	Clinical Officer		Severe	NG tube
Kenya	Hospital	District Hospital	Nurse		Severe	Intraosseus
Kenya	Hospital	District Hospital	Nurse		Severe	ORS	ORS	Transfer
Kenya	Hospital	District Hospital	Nurse		Severe	ORS	ORS	Transfer
Kenya	Hospital	District Hospital	Nurse		Severe	NG tube
Kenya	Hospital	District Hospital	Nurse		Moderate	Try another IV	Try another IV
Kenya	Hospital	Referral Hospital	Medical Officer		Severe	Try another IV	Intraosseus
Kenya	Hospital	Referral Hospital	Medical Officer		Severe	Intraosseus
Kenya	Hospital	Referral Hospital	Medical Officer		Severe	Cut-down for IV	Intraosseus
Kenya	Hospital	Referral Hospital	Registrar	Pediatric	Severe	Try another IV	Intraosseus
Kenya	Hospital	Referral Hospital	Registrar	Pediatric	Moderate	Try another IV	Intraosseus
Kenya	Hospital	Referral Hospital	Consultant	Pediatric	Severe	Try another IV	Intraosseus
Kenya	Hospital	Referral Hospital	Medical Officer		Severe	Try another IV	Intraosseus
